# Supplementary material
Source: MDPI journal article supplement (https://www.mdpi.com/2073-4441/13/6/842)
Supplement: s1 [file s1]

## Supplementary Material

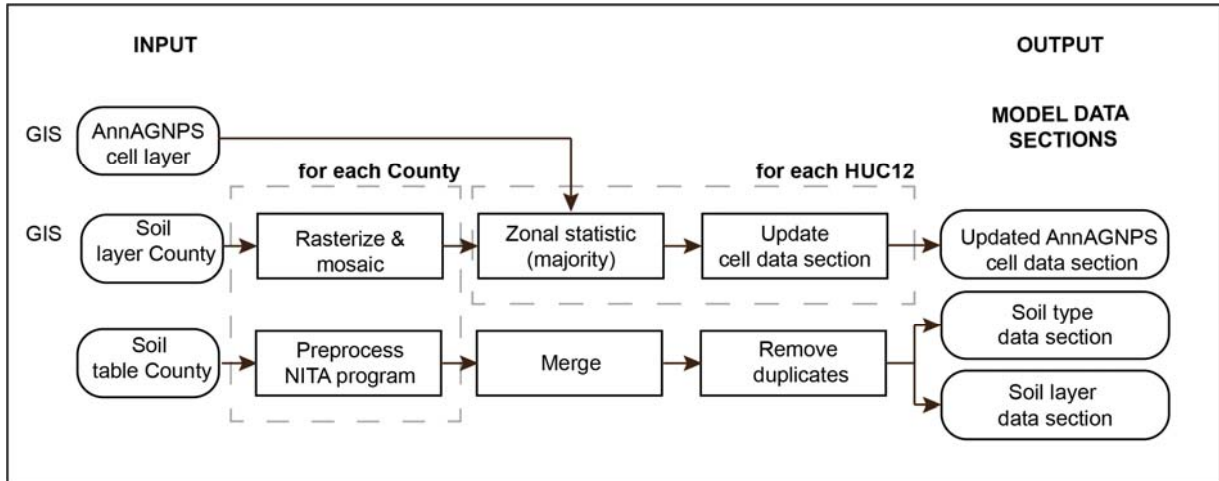

Figure S1. Schematic flowchart of the AnnAGNPS input soil data sections development.

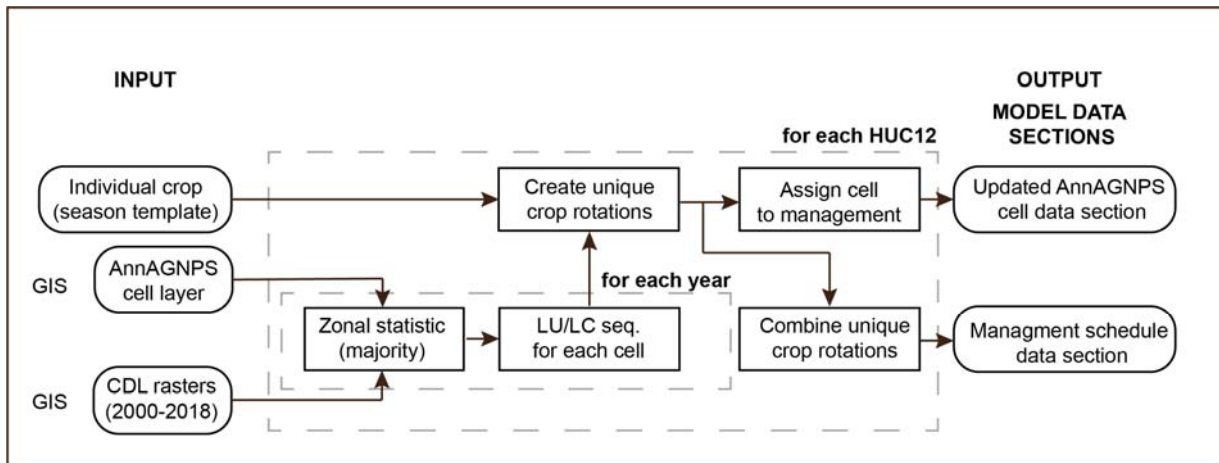

Figure S2. Schematic flowchart of the AnnAGNPS input management data section development.
